# Supplementary material for: Exploring architectures at the nanoscale: the interplay between hydrophobic twin lipid chains and head groups of designer peptide amphiphiles in the self-assembly process and application
Source: Royal Society of Chemistry journal article supplement (doi:10.1039/c6sm00147e), 2016-01-01
Supplement: c6sm00147e1.pdf [file c6sm00147e1.pdf]

## Supporting Information

**Antara Dasgupta\***

*Department of Chemistry, IIT Guwahati*

*Guwahati, Assam - 781039*

*E-mail: dg.antara@iitg.ernet.in.*

**1** - Peptide Synthesis

**2** - MALDI-TOF-MS spectra of PAs **1-7**

**3**- NMR characterisation data of PAs **1-7**

**4**-Temperature dependent  $^1\text{H}$ -NMR study of PA-**2** hydrogel

**5** -Rheological study of PA-**2** hydrogel

**6**- EDX spectrum of mineralized calcium phosphate in hydrogel of PA-**2**

## 1- Peptide Synthesis

All the peptide amphiphiles (PAs) **1-7** were synthesized by solid phase peptide synthesis (SPPS) using Rink-amide MBHA resin and standard Fmoc synthesis protocol. The use of Rink-amide resin was to provide C-terminally amidated peptides in each case containing one lysine residue and the N-terminus with either one or two lipid chains or aromatic residues. After the deprotection of Rink-amide resin with a 20%-piperidine/DMF solution, Fmoc-Lys(Boc)-OH was introduced and coupled to the resin, followed by Fmoc deprotection and coupling of either Fmoc-Glu(OtBu)-OH/Fmoc-Lys(Boc)-OH/Fmoc-Lys(Fmoc)-OH depending on the sequence. The Fmoc deprotection and coupling was repeated twice/thrice until the designed peptide sequence was obtained in each case. After Fmoc deprotection of the N-terminal residue, one or two lipid chains or aromatic residue was finally coupled to N-terminal(s). All coupling reactions were affected by treatment with HBTU/HOBt/DIPEA. Fmoc deprotection reactions were carried out by using DMF solution containing piperidine (20%, v/v). Cleavage from the resin and deprotection of the protecting groups on the side-chains were performed concurrently with a mixture of TFA, DCM and H<sub>2</sub>O at a ratio of 95:2.5:2.5. After rotary evaporation, the cleaved peptides were precipitated with cold diethyl ether, washed thrice with cold ether and then lyophilized.

<sup>1</sup>H NMR, were recorded on a NMR-Bruker Ascend TM 600 MHz (Bruker, Coventry, UK). ESI-MS was performed by using a QToF Premier Quadrupole mass spectrometer.

## 2- MALDI-TOF-MS spectra of PAs1-7

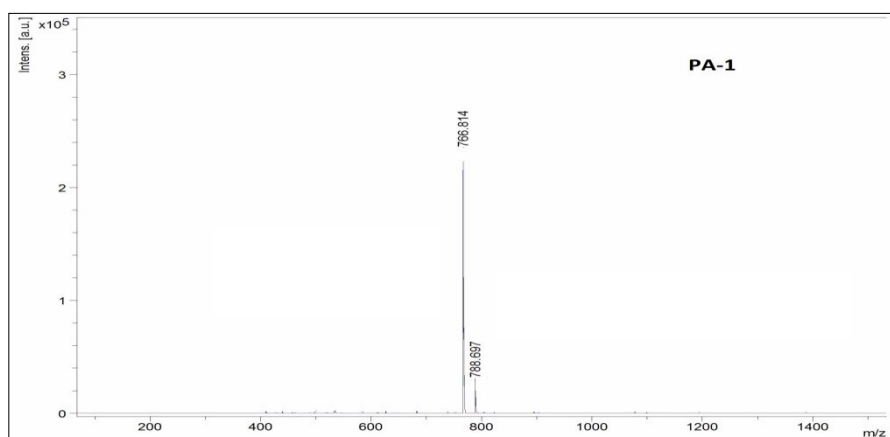

Fig. S1: Maldi spectra of PA-1

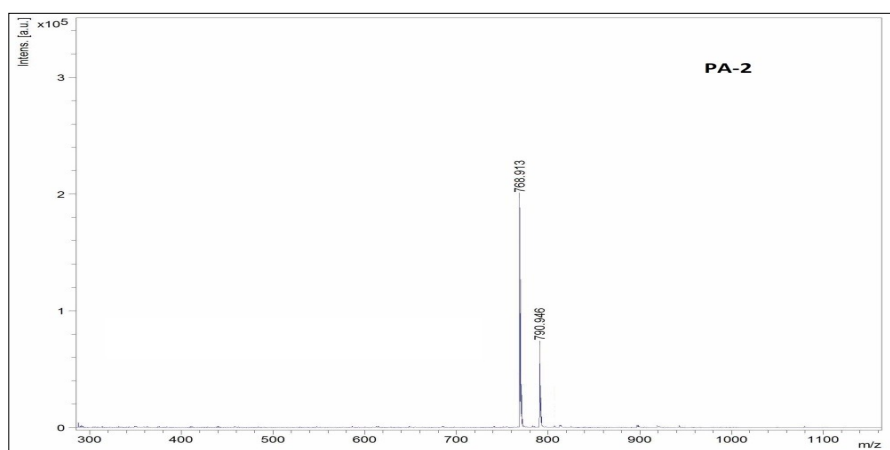

Fig. S2: Maldi spectra of PA-2

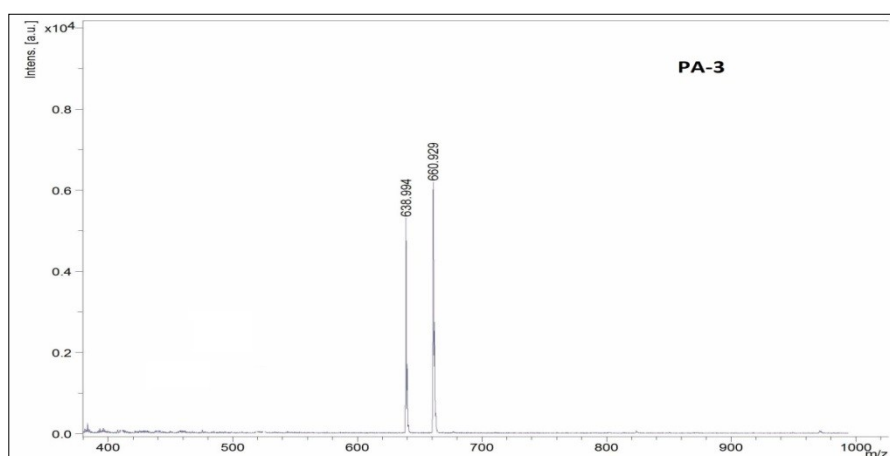

Fig. S3: Maldi spectra of PA-3

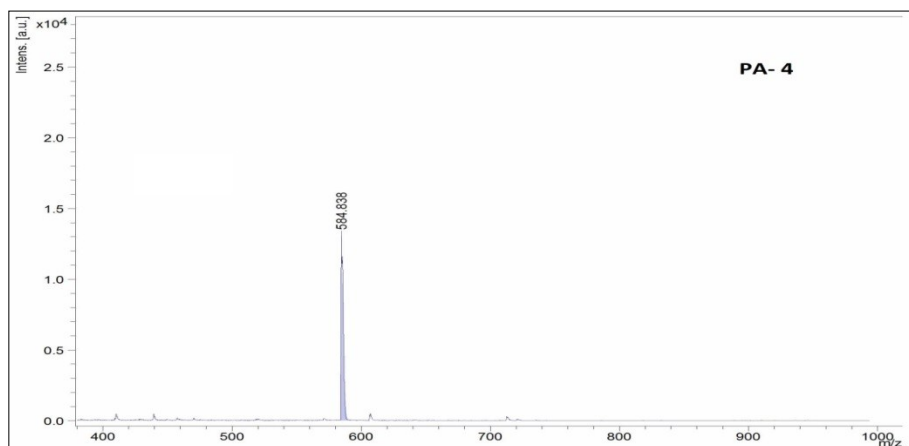

**Fig. S4:** Maldi spectra of PA-4

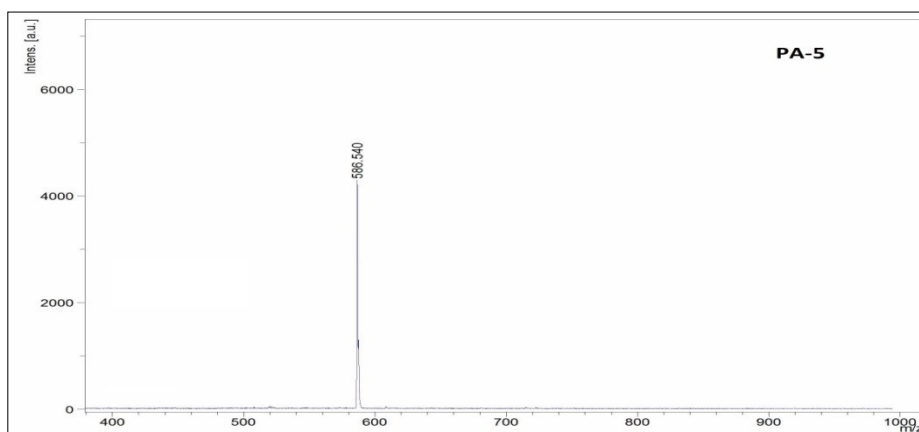

**Fig. S5:** Maldi spectra of PA-5

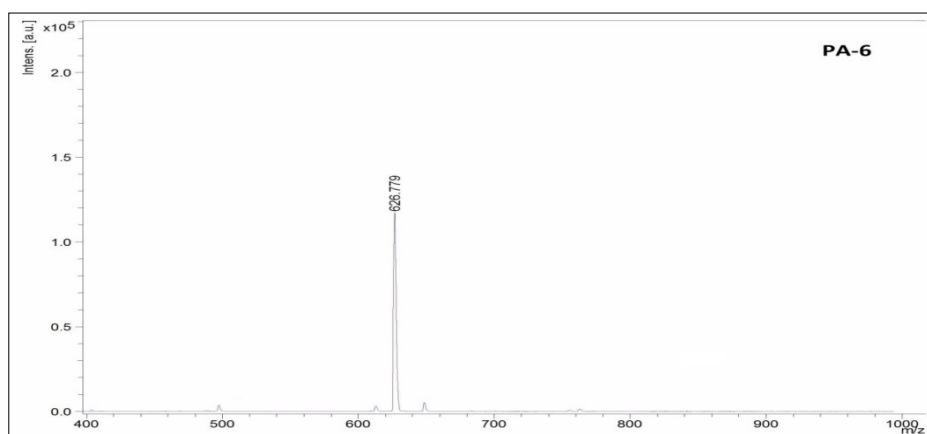

**Fig. S6:** Maldi spectra of PA-6

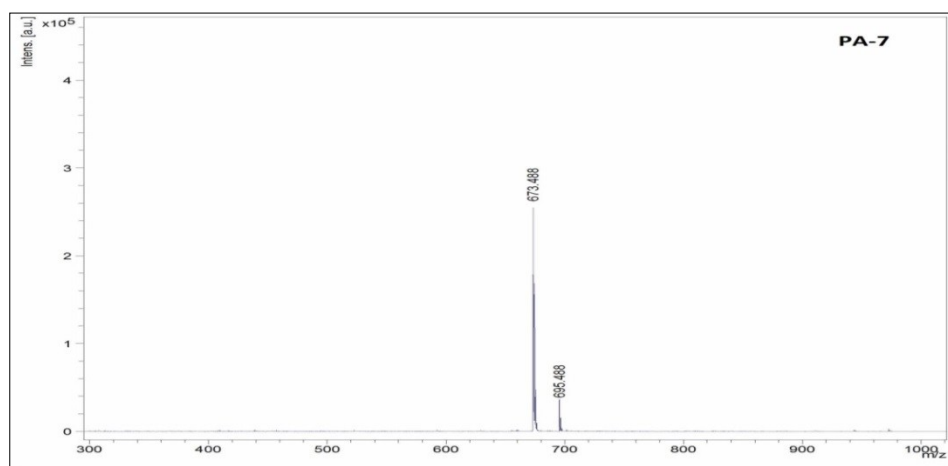

**Fig. S7:** Maldi spectra of PA-7

### 3 - NMR characterisation data of PAs 1-7

PA – **1** -<sup>1</sup>H NMR (600 MHz, D<sub>6</sub>-DMSO):  $\delta$  = 0.84–0.86 (t, J = 6.0 Hz, 6H), 1.24 (br, 32H), 1.46 (br, 16H), 1.51 (br, 6H), 2.01-2.03 (br, 4H), 2.75 (br, 4H), 2.99 (br, 2H), 4.15 (br, 3H) 7.07 (NH, br, 1H), 7.36 (NH, br, 1H), 7.84 (NH, br, 1H), 7.95-7.97 (NH, t, J = 6 Hz, 1H), ppm; MS (ESI): m/z found [M+H]<sup>+</sup> 766.6532, expected 766.6456

PA – **2** -<sup>1</sup>H NMR (600 MHz, D<sub>6</sub>-DMSO):  $\delta$  = 0.84–0.86 (t, J = 6.0 Hz, 6H), 1.23 (br, 32H), 1.46 (br, 12H), 1.51 (br, 4H), 1.79 (br, 2H), 2.01-2.03 (br, 4H), 2.74 (br, 4H), 2.99 (br, 2H), 4.15 (br, 3H) 7.07 (NH, br, 1H), 7.30 (NH, br, 1H), 7.82 (NH, br, 1H), 7.96-7.98 (NH, t, J = 6.0 Hz, 1H), 12.15(-COOH, br, 1H) ppm; MS (ESI): m/z found [M+H]<sup>+</sup> 767.5802, expected 767.5932

PA – **3** -<sup>1</sup>H NMR (600 MHz, D<sub>6</sub>-DMSO):  $\delta$  = 0.84–0.86 (t, J = 6.0 Hz, 6H), 1.24 (br, 32H), 1.46 (br, 12H), 1.51 (br, 4H), 2.01-2.03 (br, 2H), 2.08-2.11 (m, 2H), 2.75 (br, 2H), 2.99 (br, 2H), 4.15 (br, 2H) 7.05 (NH, br, 1H), 7.29 (NH, br, 1H), 7.92 (NH, d, 1H), ppm; MS (ESI): m/z found [M+H]<sup>+</sup> 638.5653, expected 638.55

PA – **4** -<sup>1</sup>H NMR (600 MHz, D<sub>6</sub>-DMSO):  $\delta$  = 0.84–0.86 (t, J = 6.0 Hz, 3H), 1.22 (br, 18H), 1.49 (br, 12H), 1.62 (br, 6H), 2.10 (br, 2H), 2.73 (br, 6H), 4.11 (br, 3H), 7.04 (NH, br, 1H), 7.35 (NH, br, 1H), 7.94 (NH, d, 1H), ppm; MS (ESI): m/z found [M+H]<sup>+</sup> 584.487, expected 584.4785

PA – **5** -<sup>1</sup>H NMR (600 MHz, D<sub>6</sub>-DMSO):  $\delta$  = 0.83-0.85 (t, J = 6.0 Hz, 3H), 1.22 (br, 18H), 1.50 (br, 8H), 1.63 (br, 4H), 1.73 (br, 2H), 2.10 (br, 2H), 2.4 (br, 2H) 2.73 (br, 4H), 4.13 (m, 3H),

7.05 (NH, br, 1H), 7.26 (NH, br, 1H), 7.80 (NH, d, 1H), 12.15(-COOH, br, 1H)ppm; MS (ESI): m/z found [M+H]<sup>+</sup>585.435, expected 585.4261

PA – 6 -<sup>1</sup>H NMR (600 MHz, D<sub>6</sub>-DMSO): δ = 1.27 (br,4H), 1.49 (br, 4H), 1.62 (br, 2H), 1.77 (br, 2H), 1.89 (br, 2H), 2.23 (br, 4H), 2.73 (br, 4H), 3.88 (br, 1H), 3.96 (br, 2H), 4.21 (br, 1H), 4.28 (br, 2H), 7.05 (NH,br, 1H), 7.31 (m, 2H), 7.41 (m, 2H), 7.69 (m, 2H), 7.89 (m, 2H) ), 12.15(-COOH, br, 1H) ppm; MS (ESI): m/z found [M+H]<sup>+</sup>625.34, expected 625.33

PA – 7 -<sup>1</sup>H NMR (600 MHz, D<sub>6</sub>-DMSO): δ = 1.25 (br, 4H), 1.50 (br, 4H), 1.63 (br, 2H), 1.73 (br, 2H), 1.89 (br, 2H), 2.00 (br, 2H), 2.26 (m, 4H), 2.73 (br, 4H), 3.33 (m, 2H), 4.10 (br, 2H), 4.34 (br, 1H), 7.06 (NH, br, 1H), 7.34 (NH, br, 1H), 7.75 (NH, br, 1H), 7.84 (d, J=6 Hz, 1H), 7.94 (d, J=6 Hz, 2H), 8.05 (m, 3H), 8.19 (m, 2H), 8.36 (d, J=6 Hz, 1H), 12.15 (-COOH, br, 1H) ppm; MS (ESI): m/z found [M+H]<sup>+</sup> 673.4, expected 673.36.

#### 4. Temperature dependent <sup>1</sup>H-NMR study of PA-2 hydrogels

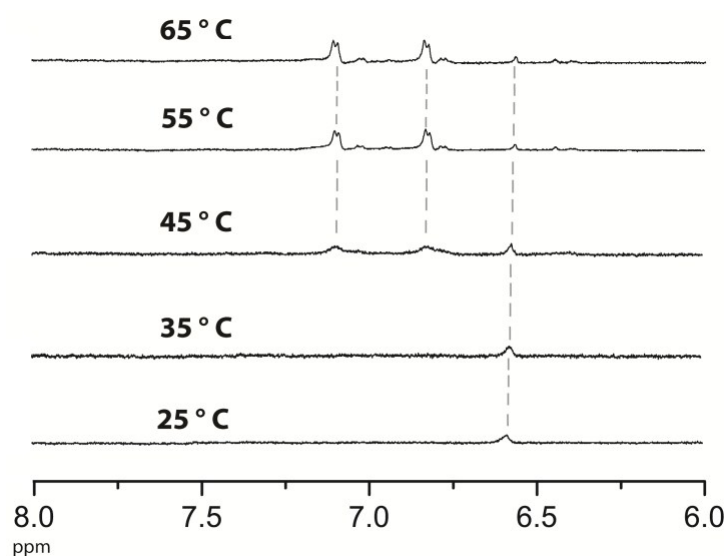

**Fig. S8:** <sup>1</sup>H-NMR spectra of PA-2(2 wt%) in 50% [D<sub>6</sub>]DMSO/50% D<sub>2</sub>O with increasing temperature

## 5. Rheology

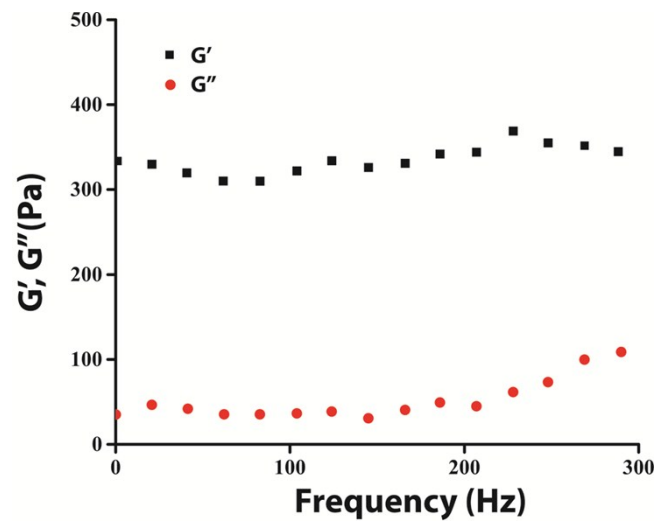

Fig. S9: Elastic Modulus of PA-2 hydrogel

## 6. EDX spectrum of mineralized calcium phosphate in hydrogels of PA-3

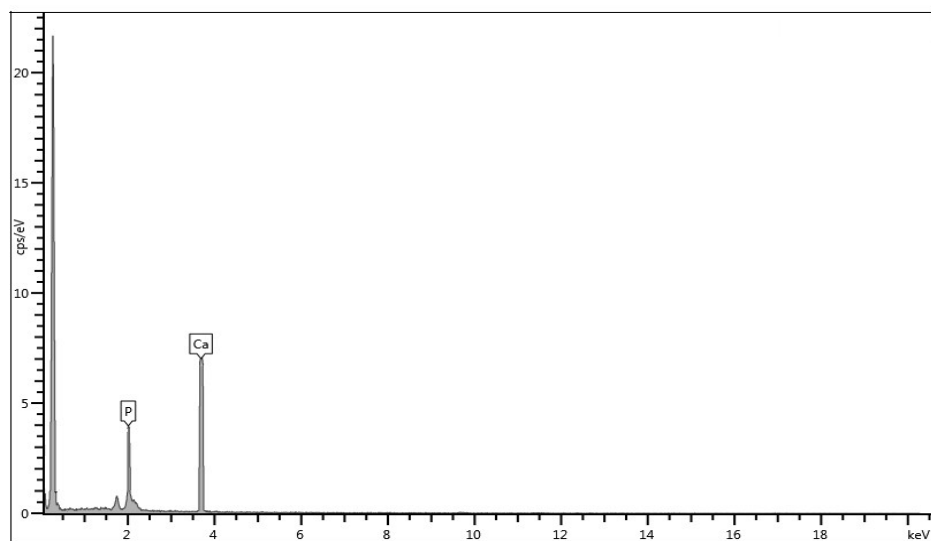

Fig. S10: Energy dispersive X-ray analysis of hybrid nanofibers obtained from the hydrogels of PA - 3 in FESEM observation after calcium phosphate biomineralization
